# Supplementary material for: Student-centered instructional policies are associated with more positive student perceptions of their instructor's universality beliefs, but these perceptions favor White instructors in STEM
Source: Research Square preprint supplement (doi:10.21203/rs.3.rs-7190396/v1), 2025-08-12
Supplement: Supplementary file 1 [file 59bce07504904a3c9d360470.docx]

# Supplemental Information

## Questionnaire

| **Table 1** Adaptation of the universality beliefs in the ULTrA survey | |
| --- | --- |
| Original Item | Student Version |
| **Universal Beliefs** | **Perceived Instructor Universal Beliefs (PIUBs)** |
| 1. With enough hard work, anyone could become as good at analyzing information as highly successful STEM professionals. | The professor in this course seems to believe that with enough hard work, any student could become as good at analyzing information as highly successful STEM professionals. |
| 2. Anyone who tries could become as good at applying knowledge as STEM experts. | The professor in this course seems to believe that any student who tries could become as good at applying knowledge as STEM experts. |
| 3. Anyone could become as effective at learning as highly successful STEM students. | The professor in this course seems to believe that any student could become as effective at learning as highly successful STEM students. |
| 4. Everyone has the intellectual ability to become a successful STEM professional if they want to. | The professor in this course seems to believe that every student has the intellectual ability to become a successful STEM professional if they want to. |
| 5. With enough motivation, anyone can become as good at applying knowledge as high achieving STEM students | The professor in this course seems to believe that with enough motivation, any student can become as good at applying knowledge as high achieving STEM students. |
| **Nonuniversal Beliefs** | **Perceived Instructor Nonuniversal Beliefs (PINUBs)** |
| 6. Even if they try, some people could never become as effective at analyzing information as their peers. | The professor in this course seems to believe that even if they try, some students could never become as effective at analyzing information as their peers. |
| 7. Only people with a natural talent can become good enough at applying knowledge to solve the most difficult problems. | The professor in this course seems to believe that only students with a natural talent can become good enough at applying knowledge to solve the most difficult problems. |
| 8. Only people with a natural talent can become excellent at analyzing information. | The professor in this course seems to believe that only students with a natural talent can become excellent at analyzing information. |
| 9. Some people will always be less effective at learning than those who have a natural talent for it. | The professor in this course seems to believe that some students will always be less effective at learning than those who have a natural talent for it. |
| 10. Only some people have the intellectual ability to become a successful STEM professional. | The professor in this course seems to believe that only some students have the intellectual ability to become a successful STEM professional. |
| Answer Choices: 1-Strongly Disagree; 2-Disagree; 3-Somewhat Disagree; 4-Somewhat Agree; 5-Agree; 6-Strongly Agree Prefer not to answer | |

## Measurement Invariance Testing

Configural invariance involves freely estimating all parameters simultaneously for each group (White and BIPOC). If the model fit remains acceptable based on CFI/TLI, RMSEA, and SRMR, it indicates that items within each factor correlate similarly across groups. The models demonstrated acceptable fit for race, gender, and age, affirming configural invariance (Table 2). Next, achieving metric (weak) invariance entails constraining the unstandardized slope (equal factor loadings) between groups and comparing it to the configural model. Generally, an insignificant Δχ2 suggests measurement invariance but is dependent may be dependent on sample size. Thus, using ΔCFI, ΔSRMR, and ΔRMSEA is a more robust way to determine if invariance holds and is independent of sample size. Based on the following thresholds for metric invariance ΔCFI (< 0.01), ΔSRMR (< 0.03), and ΔRMSEA (< 0.015), it was found that metric invariance held for all demographic groups (Table X), prompting an examination of scalar variance. Scalar variance involves constraining unstandardized intercepts to be equal in addition to equal factor loadings. The scalar model is then compared to the metric model using parameter cutoffs (ΔCFI < 0.01, ΔSRMR < 0.01, and ΔRMSEA < 0.015) to establish scalar invariance. In this study, scalar invariance was confirmed across all demographic groups.

| **Table 2** Measurement invariance testing (n = 625). Model fit indices (Χ2, CFI/TLI, RMSEA) are robust estimates. Significance levels are represented: p < 0.001 ***. | | | | | | | | | | |
| --- | --- | --- | --- | --- | --- | --- | --- | --- | --- | --- |
| Group | Model | Χ2 | df | CFI/TLI | RMSEA | SRMR | ΔΧ2(df) | ΔCFI | ΔRMSEA | ΔSRMR |
|  | Aggregated | 138 | 26 | 0.980/0.972 | 0.059 | 0.018 | --- | --- | --- | --- |
| Race | Configural  Metric  Scalar | 204***  212***  221*** | 52  59  66 | 0.975/0.965  0.975/0.970  0.975/0.972 | 0.089  0.083  0.068 | 0.025  0.028  0.030 | ---  6.22 (7)  9.19 (7) | ---  0.000  0.000 | ---  -0.006  0.004 | ---  0.003  0.001 |
| Gender | Configural  Metric  Scalar | 175***  182***  184*** | 52  59  66 | 0.980/0.973  0.980/0.976  0.981/0.979 | 0.079  0.074  0.068 | 0.025  0.030  0.031 | ---  6.03 (7)  2.59 (7) | ---  0.000  0.001 | ---  -0.005  -0.006 | ---  0.006  0.000 |
| Age | Configural  Metric  Scalar | 166***  175***  179*** | 52  59  66 | 0.986/0.980  0.985/0.982  0.986/0.985 | 0.067  0.063  0.058 | 0.021  0.028  0.029 | ---  8.01 (7)  3.61 (7) | ---  0.000  0.001 | ---  -0.003  -0.005 | ---  0.007  0.001 |
| Gen | Configural  Metric  Scalar | 189***  204***  212*** | 52  59  66 | 0.978/0.970  0.976/0.971  0.979/0.974 | 0.083  0.080  0.076 | 0.023  0.034  0.035 | ---  11.60 (7)  8.22 (7) | ---  0.002  0.000 | ---  -0.002  -0.004 | 0.011  0.001 |

## Syllabus Rubric

| **Table 3** Final modified rubric used for syllabi scoring | | | | | |
| --- | --- | --- | --- | --- | --- |
| Factor | Item | 0 | 1 | 2 | 3 |
| **COM** | Accessibility of Teacher | No prescribed office hours or only one form of communication provided | Available for only prescribed number of office hours; provides office phone and email | Available for more than prescribed number of office hours through appointment; provide office phone, email, and other forms of communication; encourages interaction | Available for more than prescribed number of office hours through appointment; offers phone, email, other forms of communication; encourages interaction through multiple modalities (virtual and in person) |
|  | Syllabi sample | Only email is provided | “M/W/F 1:00-2:00 PM” | “Mon & Wed: 12:00-1:00pm in office location, or by appointment” | "I also hold two regular student hours per week during which time  students are welcome to drop by without appointment and can expect me to be present in my office, as listed at the top of the syllabus. Additionally, I am happy to make an appointment to  meet with you at any other time that is mutually convenient for us. If you’d rather meet virtually, such as through Google Meet, I am happy to do so as well.” |
|  | Learning Rationale | None specified | Some explanation of assignments and activities but not tied directly to learning outcomes | Rationale provided for most assignments and activities; tied to learning outcomes | Thorough rationale provided for assignments, activities, methods, policies and procedures; tied to learning outcomes |
|  | Syllabi Samples | "Exams will measure students learning achievements on ‘X’ concepts (short definition,  multiple choices), ‘X’ materials (multiple choice, diagrams), and usage of ‘X’  knowledge (data analyses, design of genetic engineering)." | "Studies have shown that there is a direct correlation between performance and class attendance." | "Due to the unique needs of the organizations we work with, and the applied nature of the project, students will have to engage with peer reviewed and gray  literature - including government reports, white papers, working papers, think tank  evaluations etc., that are outside of class readings." | "In a “typical” classroom an instructor lectures, students take notes, and work on homework outside of class. Research has shown, however, that this is not an effective learning strategy, particularly for skill-based  STEM classes like “X”. So, I employ a more innovative, active teaching design called the “Flipped Classroom" & "The homework gives you a chance to hone your problem-solving skills." |
|  | Collabor-ation | No opportunities for collaboration or group specified | Collaboration is encouraged but not required outside of class (forming study groups) | In-class collaboration incorporated (in-class group work in which students discuss ideas with each other) | Collaboration is incorporated in class and team projects outside of class that require constant collaboration. |
|  | Syllabi Sample | No collaborative opportunities mentioned | " You may work  collaboratively on homework assignments" | "During the workshop, the LAs will guide you in small  group learning activities" | “"participate in class discussion", "Specifically, you will (1)  research and write a pre-simulation paper in which you explain your position and strategy for then negotiations, (2) your participation in the in-class simulation, and (3) your contribution to a post-simulation debriefing." whole-class group project. |
|  | Attendance Policy | None specified | Attendance is optional and falls on the student | Attendance required and checked periodically/regularly, but students are not necessarily encouraged to attend and made to feel part of a community | Attendance required and encouraged/regularly checked through participation in polls/groupwork. Students are made to feel part of a learning community and rationale is provided for the attendance policy |
|  | Syllabi Sample | None specified | "Students are encouraged to attend class." | "Pop quizzes are unannounced quizzes meant to maximize attendance in a timely manner." | There is no technical credit for attending class, but if you do not attend class you will not be able to earn credit for the in class questions through iClicker Reef, which is a weighted component of  your course grade.”  "These in-class iClicker Reef questions are meant to help engage you in the classroom activities, enhancing  your understanding of the course material. They are also a good way for both you and me to gauge your  level of understanding." |
| **PAC** | Teacher's Role | No shared power; rules are written as directives; numerous penalties; no flexibility in policies | No shared power; while teacher is ultimate authority, some flexibility is included for policies and procedures; some accommodation for differences among students | Limited shared power; students may be offered some choice in types of assignments or weight of assignments or due dates | Shared power; teacher encourages students to participate in developing policies and procedures for class as well as input on grading, due dates and assignments |
|  | Syllabi Sample | "Students who miss class are responsible for learning about the  material covered, homework assignments, and any announcements or  examinations." | "Among your 3 mid-term exams, the lowest grade  will be dropped." | “Students are free to choose their own topics. It can be an overview of an ‘X’ subject not covered in the class, or an extension of a topic covered  in class.” | "students are also encouraged to arrange for speakers to attend class" |
|  | Student's Role | Students are told what they are responsible for learning | Students are told what they are responsible for learning but encouraged to go beyond minimum to gain reward (practice at home, etc.) | Students are given responsibility for presenting material to class in the form of in-class group work | Students are given responsibility for bringing additional knowledge to the class in the form of presentations/papers/projects. |
|  | Syllabi Sample | "The student has to complete the assignments. The student is also responsible for watching clinical  application/lecture videos and completing associated quiz." | “There will be no homework assigned from the textbook. However, you are strongly  encouraged to do the homework problems at the end of the chapters. This will serve as a guide and will aid you in  mastering the material. Solutions to the homework problems are available in the solutions manual." | "Engaging in the material by focusing on the task at hand, setting aside other work, asking questions, and collaborating in your group" | "Presentation main goal is to teach others the material. It has to be a detailed, lecture type.” |
|  | Outside Resources | No outside resources other than required textbook specified | Some reference to outside resources provided (HW platform/notes/video links to content/class recordings, tutoring, academic support services) | Multiple reference to outside resources provided (HW platform/notes/video links to content/class recordings, tutoring, academic support services) | Exhaustive reference to outside resources provided (HW platform/notes/video links to content/class recordings, tutoring, academic support services) |
|  | Syllabi Sample | None provided | "A graduate student will be available in SCLB 350 to answer any questions in your study during  weekdays from 9 am to 5 pm." | "Assigned readings, videos, worksheets, rubrics and lab protocols will be available on  Blackboard", external subject resources, university resources | "All PowerPoint presentations and other materials for lecture as well as  for labs will be available on blackboard.", study tips, university health wellness and food/housing insecurity resources |
|  | Syllabus Tone | Tone of syllabus is punitive | Tone of the syllabus is mostly punitive, but some traces of positivity | Tone of the syllabus is positive, and encouraging | Tone of syllabus is positive, encouraging, and creates an atmosphere of teamwork among students |
|  | Syllabi Sample | "Remember you can only get out of this course what you are willing to put into it…Everyone in the class could theoretically make A's or F's, depending on how much each of you learn." | Students who miss more  than 3 lectures or 3 Labs, or more than 3 Achieve assignments will result in your administrative withdrawal from the course.  If you do miss class, it is your responsibility to contact a classmate and find out what you missed, including content covered and  any announcements. We have a few measures to help make up for  some of those interruptions while maintaining standards… | Your success in this course will require regular attendance on campus ... Missing more than 4 class sessions, more  than one exam, or more than five assignments will result in your administrative withdrawal  from the course. I understand that students may face interruptions related to life. Therefore, we have a few  measures to help make up for some of those interruptions while maintaining course structure… | “Life happens! I am happy to work with you to help you get caught up…  we will endeavor at all times to  be civil and courteous in our communications. We will respect each other as fellow human  beings." |
|  | Syllabus Focus | Focus is on policies and procedures. No discussion of learning or outcomes | Weighted towards policy and procedures with some reference to content covered | Includes course objectives. Balance between policies and procedures and focus on learning | Syllabus weighted towards student learning outcomes and means of assessment; policies are present, but does not read like a contract |
|  | Syllabi Sample | Syllabus lists policies and procedures only. | Mainly procedures, but includes a course calendar with topic | Has policies and procedures, but also has learning objectives and outcomes and strategies for learning:  “Some Hints for Having a Successful ‘X’ Learning Experiences’” | Procedures are present, but mostly learner focused with statements like:  “Doing Well in this Course”: lists strategies  “Some Expectations about Classroom Behavior”: gives students tips for behaving and communicating professionally. |
| **EAS** | Grades | Grades weighted primarily toward exams/quizzes | Grades emphasizes the accumulation of points but maybe disassociated from learning performance/ may include participation/attendance/extra credit in grade | Grades emphasizes the accumulation of points but are tied to learning outcomes through the completion of assignment and HW that is regularly scheduled/; students have some options for achieving points, but still primarily weighted toward exam grades and may include attendance/ participation grades | Grades present a diverse portfolio of students' work that may be more reflective of their learning and tied to student learning objectives; Grades are more evenly weighted towards various categories. |
|  | Syllabi Sample | “The lecture grade will consist of four examinations.” | “400/600 points based in exams, attendance points via pop quizzes” | Frequent homework, class polling, participation grades, and exam (45% of grade) | "home works + work in class: 20%  final project (presentation 20% + report 5%+ Demo 10%) total 35%  midterm exam 15%  One Certificate DSDL from Udemy as a final exam : 30%" |
|  | Feedback Mechanism | The only implied form of feedback is through students' grades on summative assignments (tests). Higher stakes | Students are given feedback through more periodic HW or quizzes that help students assess how they are doing before formal exams. Lower stakes assignments | Students are given feedback through frequent HW assignments and quizzes that give them opportunities to practice what they have learned. | Students are given feedback through frequent HW/quizzes and real time feedback in class with group work/student response systems. |
|  | Syllabi Sample | “Aside from the scheduled tests, there will be NO assignments to  submit.” | Periodic quizzes | Frequent quizzes and homework assigned with feedback | Frequent quizzes and homework assigned with feedback and real time feedback with student response system |
|  | Evaluation | Students are evaluated based on performance on traditional summative evaluations (exams/quizzes) | Students are evaluated based on exams and frequent formative assessments (HW) that help students progress in their learning | Students are evaluated based on summative, formative, and collaborative assessment (group work) | Students are evaluated based on summative, formative, collaborative, generative assessment |
|  | Syllabi Sample | “Aside from the scheduled tests, there will be NO assignments to  submit.” | Exams and Homework | Homework, quizzes, exams, and in-class activities | Homework, quizzes, exams and “Projects: includes recorded video and In-Class Mini-presentation” |
|  | Learning Outcomes | No outcomes stated/ university core outcomes are stated as blanket statement | Goals for course stated but not in the form or learning outcomes | Learning outcomes clearly stated | Learning outcomes stated and are tied to specific assessments |
|  | Syllabi Sample | None specified | “Outcome: The development of a fundamental understanding and demonstrated mastery of knowledge addressing the…” | "Students are expected to predict when a  specific gene will be expressed or closed, to list different types of mutations, to list DNA  metabolizing enzymes applicable for gene manipulation, and to apply DNA-manipulation  strategies in generating desired mutations." | Outcome: "· develop clear roles for team members"  Assignment desc: "Each team member will have designated responsibilities to the project as determined by the team.", "Team norming session / Team Roles and Responsibilities Discussion"  Research a part of both learning outcomes and a specific assignment "research plan" |
|  | Revision/ Redoing | No rewriting or redoing of assignments allowed | Some rewriting or redoing of assignments allowed, but penalized (partial credit) | Rewriting and redoing of assignments allowed without penalty | Rewriting and redoing of assignments encouraged or required points earned. |
|  | Syllabi Sample | None specified | "You will have  unlimited attempts to complete each question, but 5% of the points will be deducted for every wrong answer." | “You will have three attempts to complete each question in the  Pre-Class Primer.", "You will have 10 attempts for each question." (no point deductions for attempts) | "For the first 2 regular exams, you will be required to rework the problems that you missed." |

## Pairwise comparisons for instructional practices and demographics on universality beliefs

**Race**

| **Table 4** Tukey pairwise comparison of students’ **PINUBs** based on instructional practices and **race** on ranked data | | | | | | | |
| --- | --- | --- | --- | --- | --- | --- | --- |
| Race | Instructional Practices | | Rank Diff | | SE | t-value | p-value |
| BIPOC | TC | Mid | 57.5 | | 25.0 | 2.30 | 0.057 |
|  | Mid | SC | 42.8 | | 20.5 | 2.09 | 0.093 |
|  | **TC** | **SC** | **100.4** | | **23.7** | **4.23** | **0.0001** |
| White | TC | Mid | 26.3 | | 25.0 | 1.05 | 0.55 |
|  | Mid | SC | 4.8 | | 19.9 | 0.24 | 0.97 |
|  | TC | SC | 31.1 | | 23.8 | 1.31 | 0.39 |
| Instructional Practices | Race | | Rank Diff | SE | | t-ratio | p-value |
| **TC** | **BIPOC** | **White** | **69.73** | **28.0** | | **2.49** | **0.013** |
| Mid | BIPOC | White | 38.50 | 21.7 | | 1.78 | 0.076 |
| SC | BIPOC | White | 0.46 | 18.6 | | 0.025 | 0.98 |
| df = 516 | | | | | | | |

| **Table 5** Tukey pairwise comparison of students’ **PIUBs** based on instructional practices and **race** on ranked data | | | | | | | |
| --- | --- | --- | --- | --- | --- | --- | --- |
| Race | Instructional Practices | | Rank Diff | | SE | t-value | p-value |
| BIPOC | TC | Mid | -5.15 | | 24.9 | -0.21 | 0.98 |
|  | Mid | SC | -39.34 | | 20.4 | -1.93 | 0.13 |
|  | TC | SC | -44.49 | | 23.6 | -1.88 | 0.15 |
| White | TC | Mid | -7.85 | | 25.0 | -0.31 | 0.95 |
|  | Mid | SC | -16.79 | | 19.8 | -0.85 | 0.67 |
|  | TC | SC | -24.63 | | 23.7 | -1.04 | 0.55 |
| Instructional Practices | Race | | Rank Diff | SE | | t-ratio | p-value |
| TC | BIPOC | White | -7.18 | 27.9 | | -0.26 | 0.80 |
| Mid | BIPOC | White | -9.88 | 21.6 | | -0.46 | 0.65 |
| SC | BIPOC | White | 12.67 | 18.6 | | 0.68 | 0.50 |

**Gender**

| **Table 6** Tukey pairwise comparison of students’ **PINUBs** based on instructional practices and **gender** group on ranked data | | | | | | | |
| --- | --- | --- | --- | --- | --- | --- | --- |
| Gener | Instructional Practices | | Rank Diff | | SE | t-value | p-value |
| Man | TC | Mid | 4.87 | | 28.9 | 0.17 | 0.98 |
|  | Mid | SC | 18.78 | | 23.6 | 0.80 | 0.71 |
|  | TC | SC | 23.64 | | 26.8 | 0.88 | 0.65 |
| Woman | **TC** | **Mid** | **67.26** | | **22.6** | **2.98** | **0.0085** |
|  | Mid | SC | 27.23 | | 18.1 | 1.51 | 0.29 |
|  | **TC** | **SC** | **94.49** | | **21.7** | **4.35** | **0.0001** |
| Instructional Practices | Gender | | Rank Diff | SE | | t-ratio | p-value |
| TC | Man | Woman | -50.1 | 28.7 | | -1.74 | 0.082 |
| Mid | Man | Woman | 12.3 | 22.8 | | 0.54 | 0.59 |
| SC | Man | Woman | 20.8 | 19.1 | | 1.09 | 0.28 |
| df = 516 | | | | | | | |

| **Table 7** Tukey pairwise comparison of students’ **PIUBs** based on instructional practices and **gender** group on ranked data with Bonferroni adjustment | | | | | | | |
| --- | --- | --- | --- | --- | --- | --- | --- |
| Gender | Instructional Practices | | Rank Diff | | SE | t-value | p-value |
| Man | TC | Mid | 15.06 | | 28.6 | 0.53 | 0.86 |
|  | Mid | SC | -12.94 | | 23.4 | -0.55 | 0.85 |
|  | TC | SC | 2.13 | | 26.5 | 0.080 | 0.99 |
| Woman | TC | Mid | -21.58 | | 22.3 | -0.97 | 0.60 |
|  | Mid | SC | -36.90 | | 17.9 | -2.06 | 0.10 |
|  | **TC** | **SC** | **-58.48** | | **21.5** | **-2.72** | **0.02** |
| Instructional Practices | Gender | | Rank Diff | SE | | t-ratio | p-value |
| TC | Man | Woman | 44.38 | 28.4 | | 1.56 | 0.12 |
| Mid | Man | Woman | 7.73 | 22.6 | | 0.34 | 0.73 |
| SC | Man | Woman | -16.2 | 18.9 | | -0.86 | 0.39 |
| df = 516 | | | | | | | |

**Age**

| **Table 8** Tukey pairwise comparison of students’ **PINUBs** based on instructional practices and **age** group on ranked data | | | | | | | |
| --- | --- | --- | --- | --- | --- | --- | --- |
| Age Group | Instructional Practices | | Rank Diff | | SE | t-value | p-value |
| Traditional | TC | Mid | 39.2 | | 24.6 | 1.59 | 0.25 |
|  | Mid | SC | 39.2 | | 17.8 | 2.25 | 0.065 |
|  | **TC** | **SC** | **79.2** | | **23.8** | **3.33** | **0.0027** |
| Non-traditional | TC | Mid | 57.2 | | 26.9 | 2.12 | 0.086 |
|  | Mid | SC | -8.2 | | 24.4 | -0.34 | 0.94 |
|  | TC | SC | 49.0 | | 24.7 | 1.98 | 0.12 |
| Instructional Practices | Age Group | | Rank Diff | SE | | t-ratio | p-value |
| TC | Trad | Non-trad | -10.4 | 28.2 | | -0.37 | 0.71 |
| Mid | Trad | Non-trad | -28.3 | 23.1 | | -1.23 | 0.22 |
| SC | Trad | Non-trad | 19.8 | 19.5 | | 1.02 | 0.31 |
| df = 516 | | | | | | | |

| **Table 9** Tukey pairwise comparison of students’ **PIUBs** based on instructional practices and **age** group on ranked data | | | | | | | |
| --- | --- | --- | --- | --- | --- | --- | --- |
| Age Group | Instructional Practices | | Rank Diff | | SE | t-value | p-value |
| Traditional | TC | Mid | -29.31 | | 24.1 | -1.22 | 0.44 |
|  | **Mid** | **SC** | **-56.31** | | **17.4** | **-3.24** | **0.0036** |
|  | **TC** | **SC** | **-85.62** | | **23.3** | **-3.68** | **0.0008** |
| Non-traditional | TC | Mid | -4.81 | | 26.3 | -0.18 | 0.98 |
|  | Mid | SC | 26.07 | | 23.9 | 1.09 | 0.52 |
|  | TC | SC | 21.26 | | 24.1 | 0.88 | 0.65 |
| Instructional Practices | Age Group | | Rank Diff | SE | | t-ratio | p-value |
| **TC** | **Trad** | **Non-trad** | **70.6** | **27.6** | | **2.56** | **0.011** |
| **Mid** | **Trad** | **Non-trad** | **46.1** | **22.6** | | **2.04** | **0.042** |
| SC | Trad | Non-trad | -36.2 | 19.0 | | -1.90 | 0.058 |
| df = 516 | | | | | | | |

**Generational Status**

| **Table 10** Tukey pairwise comparison of students’ **PINUBs** based on instructional practices and **first-generation status** group on ranked data | | | | | | | |
| --- | --- | --- | --- | --- | --- | --- | --- |
| Gen. Status | Instructional Practices | | Rank Diff | | SE | t-value | p-value |
| First Generation | **TC** | **Mid** | **63.8** | | **25.6** | **2.49** | **0.035** |
|  | Mid | SC | 21.3 | | 21.4 | 0.99 | 0.58 |
|  | **TC** | **SC** | **85.1** | | **25.0** | **3.40** | **0.0021** |
| Continuing Gen | TC | Mid | 23.7 | | 24.8 | 0.96 | 0.61 |
|  | Mid | SC | 28.0 | | 19.5 | 1.43 | 0.3 |
|  | TC | SC | 51.7 | | 23.0 | 2.24 | 0.065 |
| Instructional Practices | Generational Status | | Rank Diff | SE | | t-ratio | p-value |
| TC | FG | CG | -14.4 | 28.2 | | -0.51 | 0.61 |
| Mid | FG | CG | 25.6 | 21.8 | | 1.18 | 0.24 |
| SC | FG | CG | 19.0 | 19.1 | | 0.99 | 0.32 |
| df = 516 | | | | | | | |

| **Table 11** Tukey pairwise comparison of students’ **PIUBs** based on instructional practices and **first-generation status** group on ranked data | | | | | | | |
| --- | --- | --- | --- | --- | --- | --- | --- |
| Gen. Status | Instructional Practices | | Rank Diff | | SE | t-value | p-value |
| First Generation | TC | Mid | -0.48 | | 24.5 | -0.019 | 0.99 |
|  | Mid | SC | -41.73 | | 19.3 | -2.16 | 0.08 |
|  | TC | SC | -42.21 | | 22.8 | -1.85 | 0.15 |
| Continuing Gen | TC | Mid | -13.19 | | 25.4 | -0.52 | 0.86 |
|  | Mid | SC | -11.80 | | 21.2 | -0.56 | 0.84 |
|  | TC | SC | -24.99 | | 24.8 | -1.01 | 0.57 |
| Instructional Practices | Generational Status | | Rank Diff | SE | | t-ratio | p-value |
| TC | FG | CG | -9.93 | 27.9 | | -0.36 | 0.72 |
| Mid | FG | CG | -22.64 | 21.6 | | -1.05 | 0.29 |
| SC | FG | CG | 7.29 | 18.9 | | 0.39 | 0.70 |
| df = 516 | | | | | | | |

## Pairwise comparisons for instructional practices and instructor demographics on universality beliefs

| **Table 12** Tukey pairwise comparison of students’ **PINUBs** based on instructional practices and **instructors’ race** | | | | | | | | | |
| --- | --- | --- | --- | --- | --- | --- | --- | --- | --- |
| Instructors’ Race | Instructional Practices Groups | | | Estimate | | SE | t-ratio | | p-value |
| BIPOC | TC | Mid | | 10.8 | | 26.0 | 0.42 | | 0.91 |
|  | Mid | SC | | 26.8 | | 24.7 | 1.09 | | 0.53 |
|  | TC | SC | | 37.7 | | 24.7 | 1.53 | | 0.28 |
| White | **TC** | **Mid** | | **67.6** | | **25.6** | **2.64** | | **0.023** |
|  | Mid | SC | | 20.1 | | 17.6 | 1.14 | | 0.49 |
|  | **TC** | **SC** | | **87.7** | | **24.6** | **3.57** | | **0.0011** |
| Instructional Practices | Instructors’ Race categories | | | Estimate | SE | | | t-ratio | p-value |
| TC | BIPOC | | White | -19.8 | 28.5 | | | -0.69 | 0.49 |
| Mid | BIPOC | | White | 37.0 | 22.8 | | | 1.63 | 0.11 |
| SC | BIPOC | | White | 30.3 | 20.0 | | | 1.51 | 0.13 |
| df = 516 | | | | | | | | | |

| **Table 13** Tukey pairwise comparison of student **PIUBs** based on instructional practices and **instructor race** | | | | | | | | | |
| --- | --- | --- | --- | --- | --- | --- | --- | --- | --- |
| Instructor Race | Instructional Practices Groups | | | Estimate | | SE | t-ratio | | p-value |
| BIPOC | TC | Mid | | 21.7 | | 25.4 | 0.85 | | 0.67 |
|  | Mid | SC | | -32.0 | | 24.1 | -1.33 | | 0.38 |
|  | TC | SC | | -10.4 | | 24.1 | -0.43 | | 0.90 |
| White | TC | Mid | | -11.1 | | 25.1 | -0.44 | | 0.90 |
|  | Mid | SC | | -23.1 | | 17.2 | -1.34 | | 0.37 |
|  | TC | SC | | -34.2 | | 24.0 | -1.43 | | 0.33 |
| Instructional Practices | Instructor Race categories | | | Estimate | SE | | | t-ratio | p-value |
| TC | BIPOC | | White | -30.10 | 27.90 | | | -1.08 | 0.28 |
| **Mid** | **BIPOC** | | **White** | **-62.9** | **22.3** | | | **-2.82** | **0.0049** |
| **SC** | **BIPOC** | | **White** | **-53.9** | **19.6** | | | **-2.76** | **0.0060** |
| df = 516 | | | | | | | | | |

## Pairwise comparisons for student and instructor race on universality beliefs

| **Table 14** Tukey pairwise comparison of student **PINUBs** based on **student race** and **instructor race** | | | | | | | | | |
| --- | --- | --- | --- | --- | --- | --- | --- | --- | --- |
| Student Race | Instructor Race | | | Estimate | | SE | t-ratio | | p-value |
| **BIPOC** | **BIPOC** | **White** | | **-37.8** | | **18.3** | **-2.07** | | **0.039** |
| **White** | **BIPOC** | **White** | | **-69.3** | | **17.7** | **-3.91** | | **0.0001** |
| Instructors’ Race | Students’ Race | | | Estimate | SE | | | t-ratio | p-value |
| BIPOC | BIPOC | | White | 18.5 | 20.0 | | | 0.93 | 0.36 |
| White | BIPOC | | White | -12.9 | 15.8 | | | -0.82 | 0.41 |
| df = 518 | | | | | | | | | |

| **Table 15** Tukey pairwise comparison of student **PIUBs** based on **student race** and **instructor race** | | | | | | | | | |
| --- | --- | --- | --- | --- | --- | --- | --- | --- | --- |
| Students’ Race | Instructors’ Race | | | Estimate | | SE | t-ratio | | p-value |
| BIPOC | BIPOC | White | | 20.4 | | 18.8 | 1.08 | | 0.28 |
| **White** | **BIPOC** | **White** | | **42.5** | | **18.2** | **2.33** | | **0.020** |
| Instructors’ Race | Students’ Race | | | Estimate | SE | | | t-ratio | p-value |
| BIPOC | BIPOC | | White | 15.6 | 20.6 | | | 0.76 | 0.45 |
| **White** | **BIPOC** | | **White** | **37.7** | **16.3** | | | **2.32** | **0.021** |
| df = 518 | | | | | | | | | |
